# Supplementary material for: Proteomic evaluation of citrate-coated silver nanoparticles toxicity in Daphnia magna
Source: Royal Society of Chemistry journal article supplement (doi:10.1039/c3an02160b), 2014-01-01
Supplement: c3an02160b.pdf [file c3an02160b.pdf]

# Proteomic evaluation of citrate-coated silver nanoparticles toxicity in *Daphnia magna*

Louis-Charles Rainville,<sup>a</sup> Darragh Carolan<sup>b</sup>, Ana Coelho Varela<sup>c</sup>, Hugh Doyle<sup>b</sup>, and David Sheehan<sup>\*a</sup>

Received (in XXX, XXX) Xth XXXXXXXXX 200X, Accepted Xth XXXXXXXXX 200X

First published on the web Xth XXXXXXXXX 200X

DOI: 10.1039/b000000000x

## Supplementary Figures

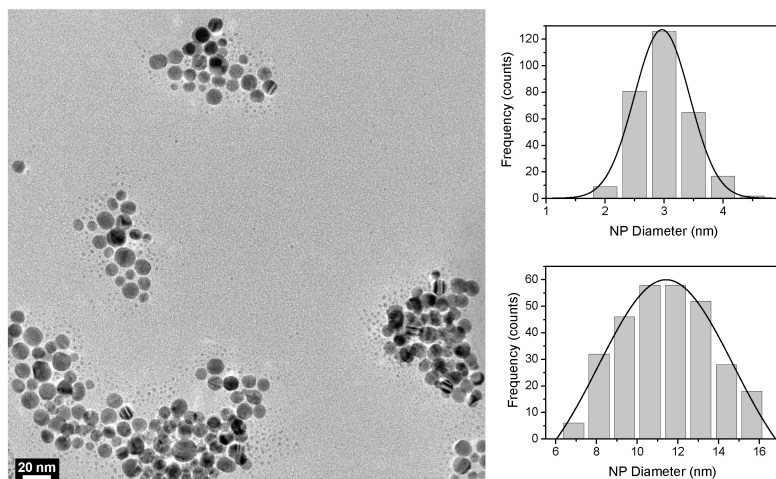

Figure S.1. TEM images of citrate-stabilised AgNPs, showing a bimodal size distribution. Inset: Size histograms of both sizes of AgNPs with Gaussian curves fitted to the data.

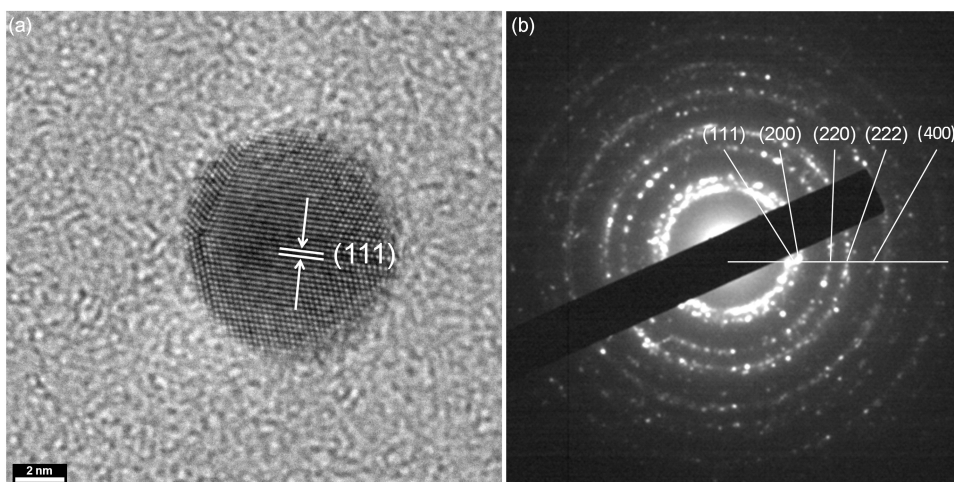

Figure S.2. (a) HR-TEM image of a single AgNP, showing an interplanar spacing of 2.34 Å, corresponding to the (111) interplanar spacing. (b) SAED pattern with indicated reflections characteristic of crystalline silver.

<sup>a</sup> AProteomics Research Group, School of Biochemistry and Cell Biology, University College Cork, Western Gateway Building 3.99, Western Road, Cork, Ireland. E-mail: d.sheehan@ucc.ie

<sup>b</sup> Tyndall National Institute, University College Cork, Lee Maltings, Cork, Ireland

<sup>c</sup> Instituto de tecnologia Quimica e Biologica, Universidade Nova de Lisboa, Av. da República, 2780-157 Oeiras, Portugal

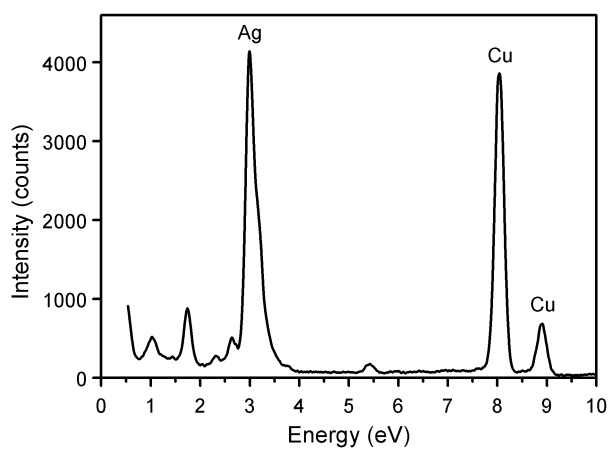

Figure S.3. EDS spectrum of citrate-stabilised AgNPs.

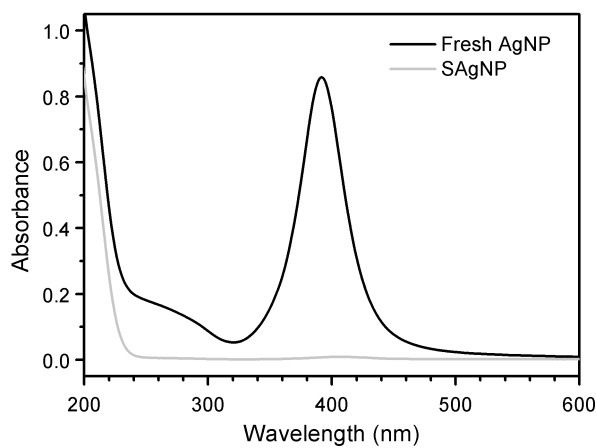

Figure S.4. UV-Vis absorption spectrum of an aqueous dispersion of the freshly prepared AgNP and SAgNP supernatant samples.
